# Supplementary material for: A flexible plasmonic SERS hydrogel patch for metabolite sensing on bio-interfaces
Source: Royal Society of Chemistry journal article supplement (doi:10.1039/d5nr04403k), 2026-01-01
Supplement: d5nr04403k1.pdf [file d5nr04403k1.pdf]

- Supporting Information -

## A Flexible Plasmonic SERS Hydrogel Patch for Metabolite Sensing on Bio-interfaces

Yide Yang<sup>#1</sup>, Zehou Su<sup>#1</sup>, Xuanting Liu<sup>1</sup>, Jiaying Song<sup>1</sup>, Chunchun Li<sup>2</sup>, Yikai Xu<sup>3\*</sup>,

Jian Ye<sup>1,4,5\*</sup>, Linley Li Lin<sup>1\*</sup>

<sup>1</sup> Sixth People's Hospital, School of Medicine & School of Biomedical Engineering,  
Shanghai Jiao Tong University, Shanghai 200030, P. R. China

<sup>2</sup> School of Materials Science and Engineering, East China University of Science and  
Technology, Shanghai 200237, P. R. China

<sup>3</sup> Key Laboratory for Advanced Materials and Feringa Nobel Prize Scientist Joint  
Research Center, Frontiers Science Center for Materiobiology and Dynamic Chemistry,  
School of Chemistry and Molecular Engineering, East China University of Science and  
Technology, Shanghai 200237, P. R. China

<sup>4</sup> Shanghai Key Laboratory of Gynecologic Oncology, Renji Hospital, School of  
Medicine, Shanghai Jiao Tong University, Shanghai 200127, P. R. China;

<sup>5</sup> Shanghai Key Laboratory of Flexible Medical Robotics, Tongren Hospital, Institute  
of Medical Robotics, Shanghai Jiao Tong University, Shanghai 200336, P. R. China;

# The authors contributed equally.

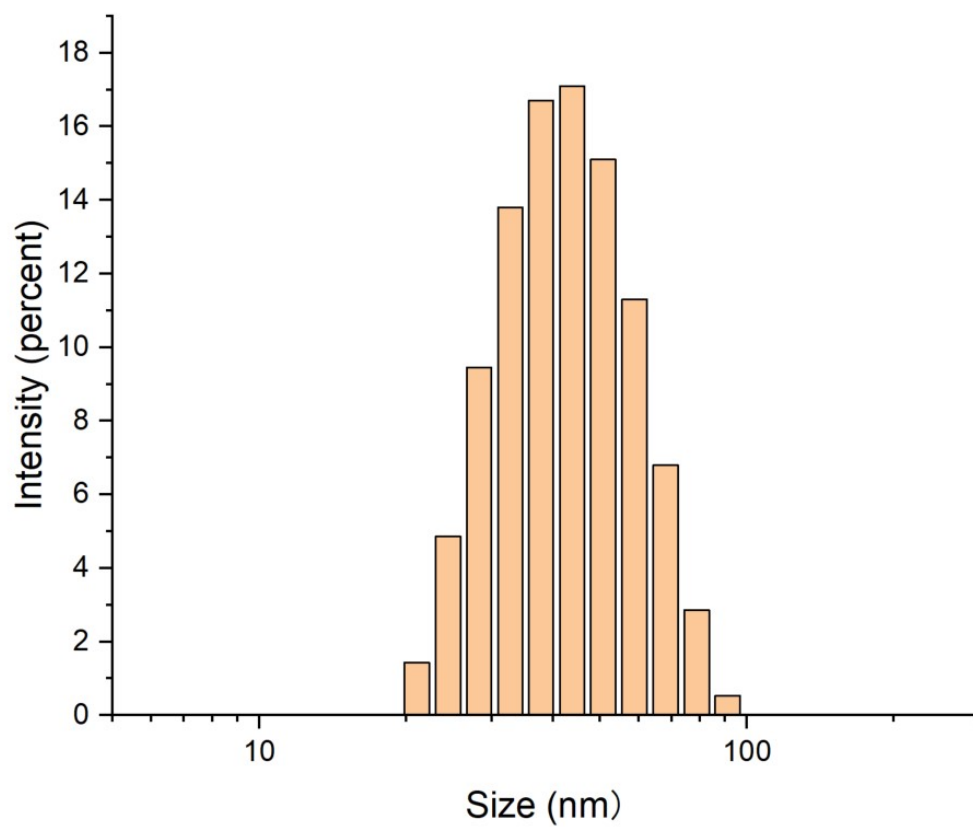

**Figure S1.** Hydrodynamic size distribution of Ag NPs, with the peak value at 44 nm.

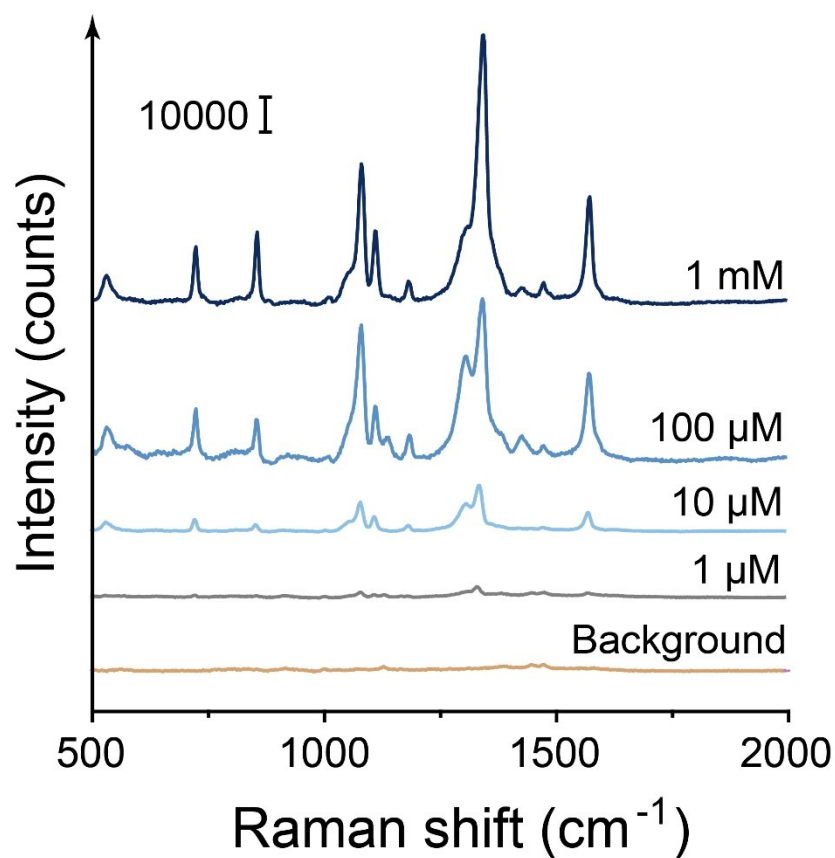

**Figure S2.** Raman signals of 4-NBT molecules at different concentrations on the SERS hydrogel. The measurements were using 785 nm excitation, 50 mW power, and 500 ms integration time.

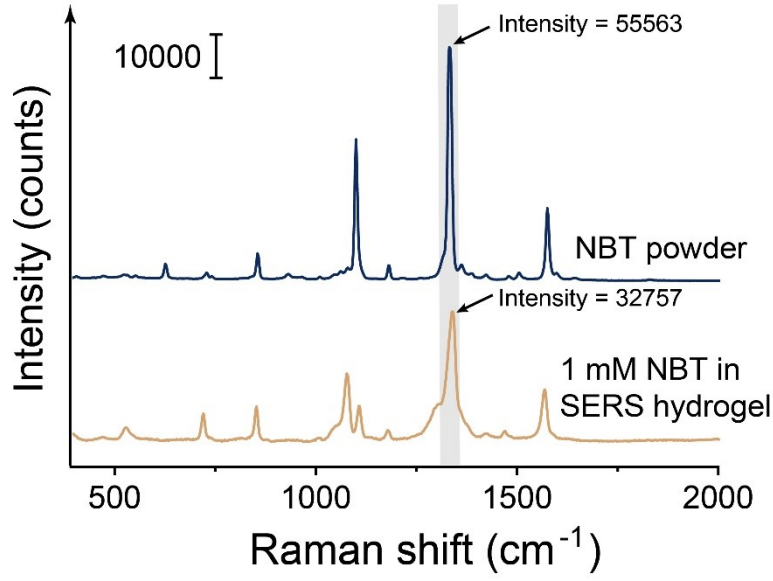

**Figure S3.** Comparison the normal Raman intensity of NBT powder (integration time = 50 ms) and SERS signal of 1 mM 4-NBT solution dropping on the SERS hydrogel (integration time = 300 ms). The enhancement factor (EF) was calculated to be  $10^5$ , by peak intensity at  $1340 \text{ cm}^{-1}$ .

EF was calculated using the following formula.

$$EF = \frac{I_{SERS}/N_{SERS}}{I_{Raman}/N_{Raman}} = \frac{I_{SERS}}{I_{Raman}} \cdot \frac{N_{Raman}}{N_{SERS}}$$

In the formula, the ratio of  $I_{SERS}$  to  $I_{Raman}$  can be calculated using peak intensity at  $1340 \text{ cm}^{-1}$ .

$$\frac{I_{SERS}}{I_{Raman}} = \frac{32757 \text{ counts}/300 \text{ ms}}{55563 \text{ counts}/50 \text{ ms}} = 0.098$$

Meanwhile,  $N_{SERS}$  and  $N_{Raman}$  represent the effective number of molecules in SERS and Raman tests.  $N_{SERS}$  can be estimated based on the area occupied by each molecule on the substrate. Assume the diameter of the light spot  $d_{spot} = 2 \text{ } \mu\text{m}$ , packing area of each molecule  $S_{molecule} = 0.2 \text{ nm}^2$ , then

$$N_{SERS} = \frac{\pi \cdot \left(\frac{d_{spot}}{2}\right)^2}{S_{molecule}} = \frac{\pi \cdot \left(\frac{2 \text{ } \mu\text{m}}{2}\right)^2}{0.2 \text{ nm}^2} = 1.57 \times 10^7$$

For  $N_{Raman}$ , the experiment is conducted on NBT powder. The density of the powder  $\rho_{NBT} = 1.2 \text{ g/cm}^3$ , molar mass of NBT  $M_{NBT} = 125.19 \text{ g/mol}$  and the volume of the excited molecules can be estimated using  $d_{spot}$  and focal depth of the lens  $l = 1.2 \text{ mm}$  [1].

$$N_{Raman} = \frac{\pi \cdot \left(\frac{d_{spot}}{2}\right)^2 \cdot l \cdot \rho_{NBT}}{M_{NBT}} \cdot N_A = \frac{\pi \cdot \left(\frac{2 \mu m}{2}\right)^2 \times 1.2 \text{ mm} \times 1.2 \text{ g/cm}^3}{125.19 \text{ g/mol}} \times 6.02 \times 10^{23} = 10^{13}$$

Therefore, the EF of the substrate,

$$EF = \frac{I_{SERS}}{I_{Raman}} \cdot \frac{N_{Raman}}{N_{SERS}} = 0.098 \times \frac{2.17 \times 10^{13}}{1.57 \times 10^7} = 1.36 \times 10^5$$

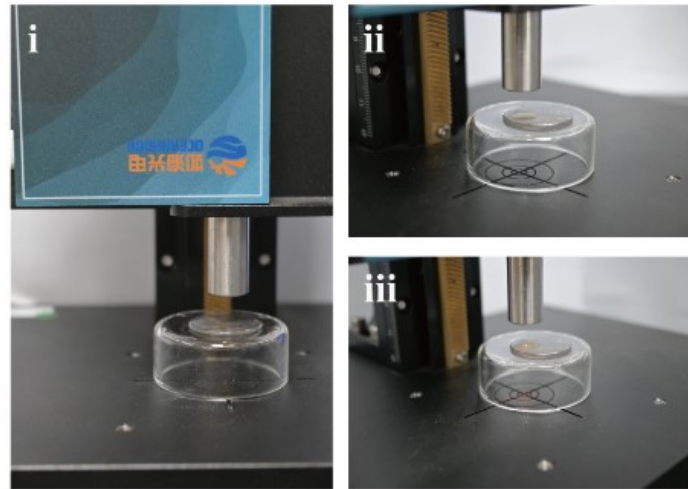

**Figure S4.** Photographs showing the SERS measurement. The SERS hydrogel is attached to a quartz plate for testing. The entire assembly is placed on a glass container for easy handling.

Reference:

[1] Li Lin, Haoqi He, Ruiyang Xue, et al. Direct and quantitative assessments of near-infrared light attenuation and spectroscopic detection depth in biological tissues using surface-enhanced Raman scattering[J]. *Med-X*, 2023, 1(1): 9-9  
<https://doi.org/10.1007/s44258-023-00010-2>
